# Supplementary material for: Enhanced oxygen reduction activity of Pt shells on PdCu truncated octahedra with different compositions
Source: Royal Society of Chemistry journal article supplement (doi:10.1039/c8ra07415a), 2018-01-01
Supplement: c8ra07415a1.pdf [file c8ra07415a1.pdf]

## Supporting Information

### **Enhanced oxygen reduction activity of Pt shells on PdCu truncated octahedra with different compositions**

Xingqiao Wu,<sup>§</sup> Qingfeng Xu,<sup>§</sup> Yucong Yan, Jingbo Huang, Xiao Li, Yi Jiang, Hui Zhang,\* Deren Yang

State Key Laboratory of Silicon Materials, School of Materials Science and Engineering, Zhejiang University, Hangzhou, Zhejiang 310027, P. R. China.

\*Correspondence to: msezhanghui@zju.edu.cn

<sup>§</sup> These two authors contribute equally to this work.

**Table S1** ICP-AES data of the Pd<sub>x</sub>Cu@Pt core-shell nanocrystals

| Samples               | Pd/Cu/Pt atomic ratio | wt% of Pt |
|-----------------------|-----------------------|-----------|
| Pd <sub>2</sub> Cu@Pt | 6.1:3:1               | 18.8      |
| PdCu@Pt               | 4.5:4.3:1             | 20.6      |
| PdCu <sub>2</sub> @Pt | 4.2:7.4:1             | 17.4      |

**Table S2** Average number (n) of Pt atomic layers and the weight percentage of Pt derived from the geometry analysis and ICP-AES data.

| Samples               | n of Pt atomic layers | weight percentage of Pt calculated from the value of n | weight percentage of Pt calculated from the ICP data |
|-----------------------|-----------------------|--------------------------------------------------------|------------------------------------------------------|
| Pd <sub>2</sub> Cu@Pt | 2                     | 14.36 (n=1)                                            | 18.8                                                 |
|                       |                       | 25.45 (n=2)                                            |                                                      |
| PdCu@Pt               | 2                     | 13.62 (n=1)                                            | 20.6                                                 |
|                       |                       | 23.39 (n=2)                                            |                                                      |
| PdCu <sub>2</sub> @Pt | 1                     | 17.9 (n=1)                                             | 17.4                                                 |
|                       |                       | 30.9 (n=2)                                             |                                                      |

**Table S3** Electrochemical performances of the Pd<sub>x</sub>Cu@Pt and Pt/C catalysts

| Samples               | ECSA (m <sup>2</sup> /g <sub>Pt</sub> ) | <i>i</i> <sub>s</sub> (mA/cm <sup>2</sup> ) | <i>i</i> <sub>m</sub> (mA/μg <sub>Pt</sub> ) | <i>i</i> <sub>m</sub> /ADT* (mA/μg <sub>Pt</sub> ) | durability** |
|-----------------------|-----------------------------------------|---------------------------------------------|----------------------------------------------|----------------------------------------------------|--------------|
| Pd <sub>2</sub> Cu@Pt | 129.0                                   | 0.46                                        | 0.59                                         | 0.42                                               | 71.2%        |
| PdCu@Pt               | 106.2                                   | 0.37                                        | 0.39                                         | 0.24                                               | 61.5%        |
| PdCu <sub>2</sub> @Pt | 70.3                                    | 0.31                                        | 0.22                                         | 0.15                                               | 68.2%        |
| Pt/C                  | 78.2                                    | 0.17                                        | 0.13                                         | 0.096                                              | 73.8%        |

\*The results of ADTs with 10,000 cycles are listed here.

\*\*The durability is obtained by using the ratio of current densities after and before the ADTs.

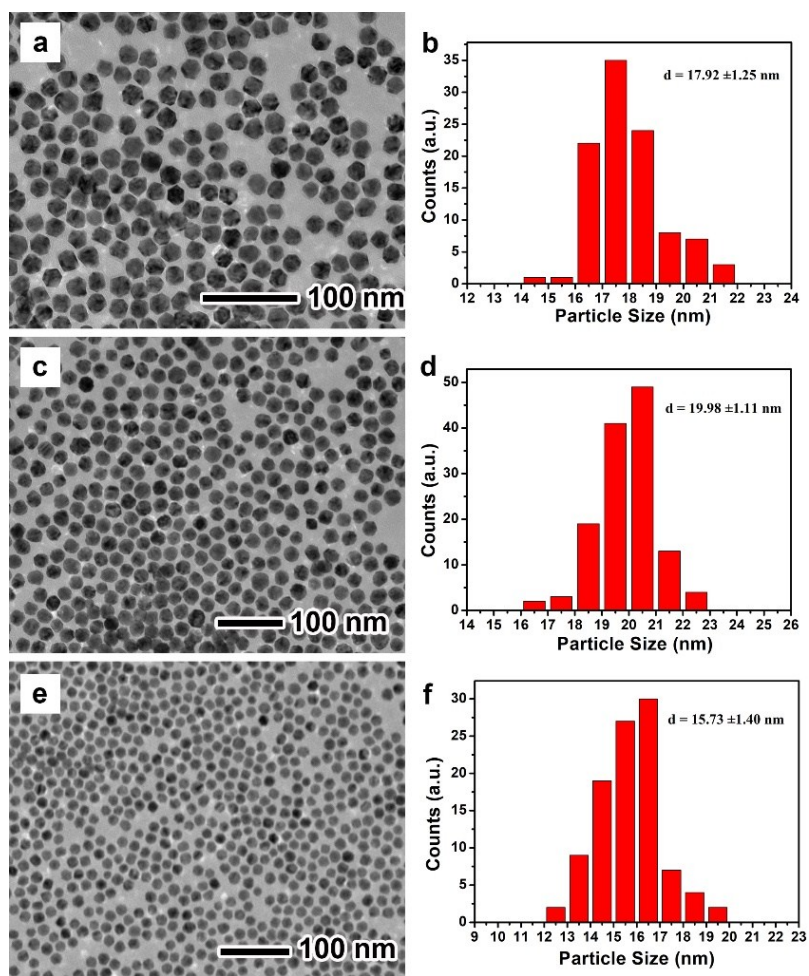

**Fig. S1** (a, c, e) TEM images and (b, d, f) corresponding size distributions of Pd<sub>2</sub>Cu, PdCu and PdCu<sub>2</sub> truncated octahedra.

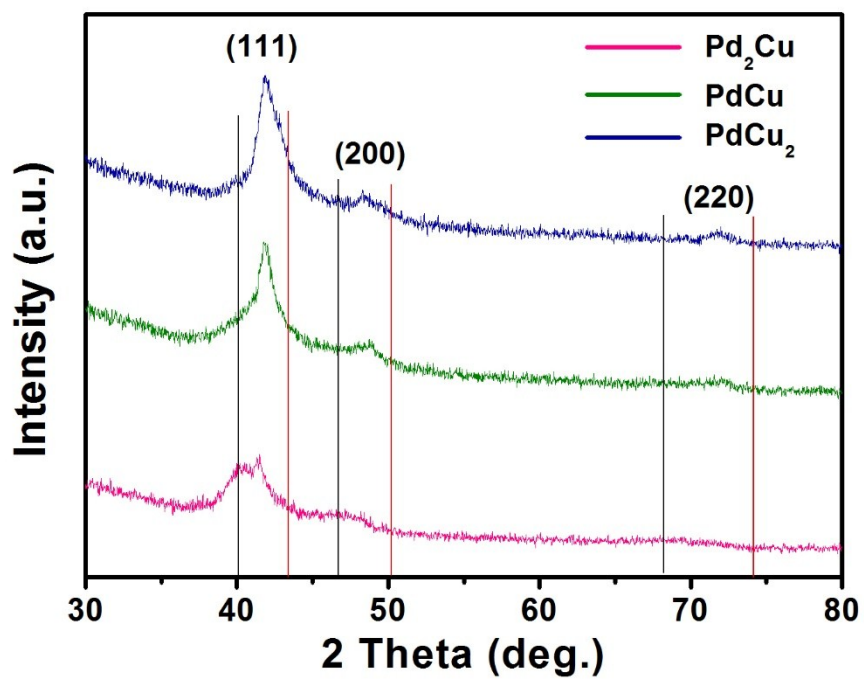

**Fig. S2** XRD patterns of Pd<sub>2</sub>Cu, PdCu and PdCu<sub>2</sub> truncated octahedra. The black and red vertical lines represent the positions of standard diffraction peaks for Pd and Cu, respectively.

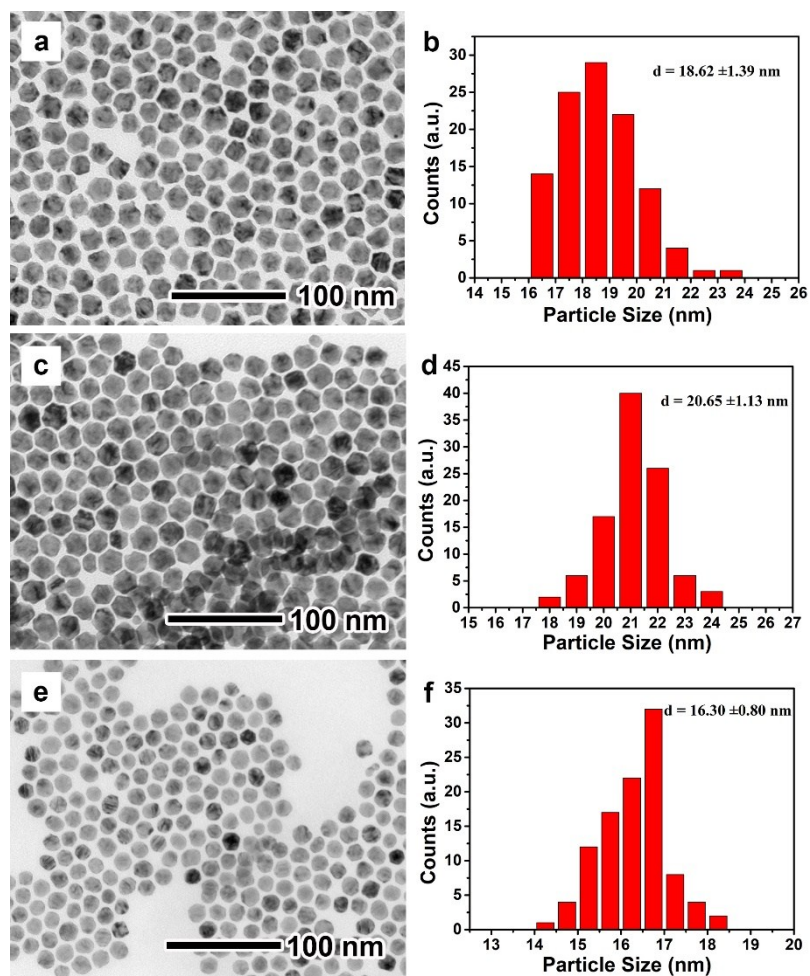

**Fig. S3** (a, c, e) TEM images and (b, d, f) corresponding size distributions of Pd<sub>2</sub>Cu@Pt, PdCu@Pt and PdCu<sub>2</sub>@Pt truncated octahedra.

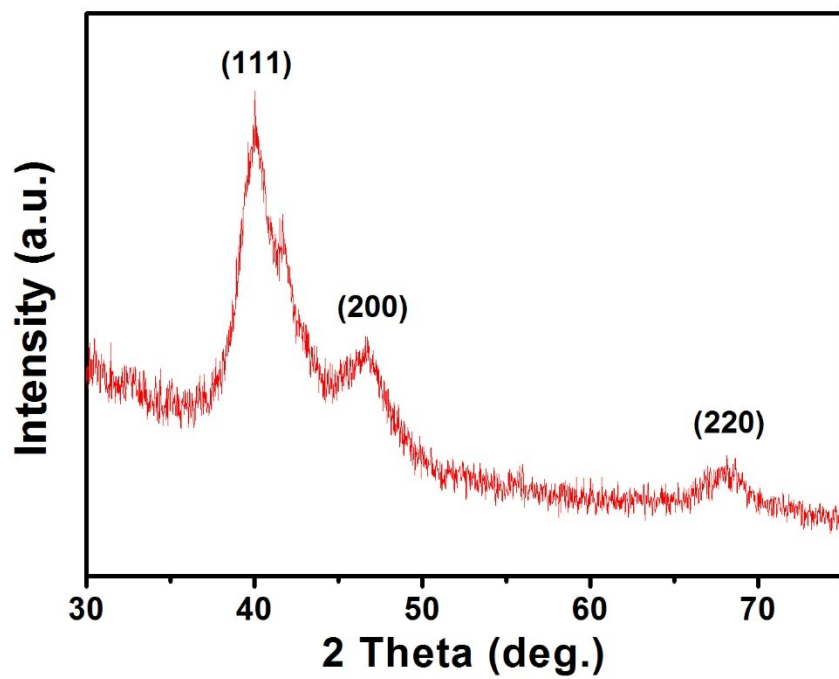

Fig. S4 XRD patterns of Pd<sub>2</sub>Cu@Pt truncated octahedra.

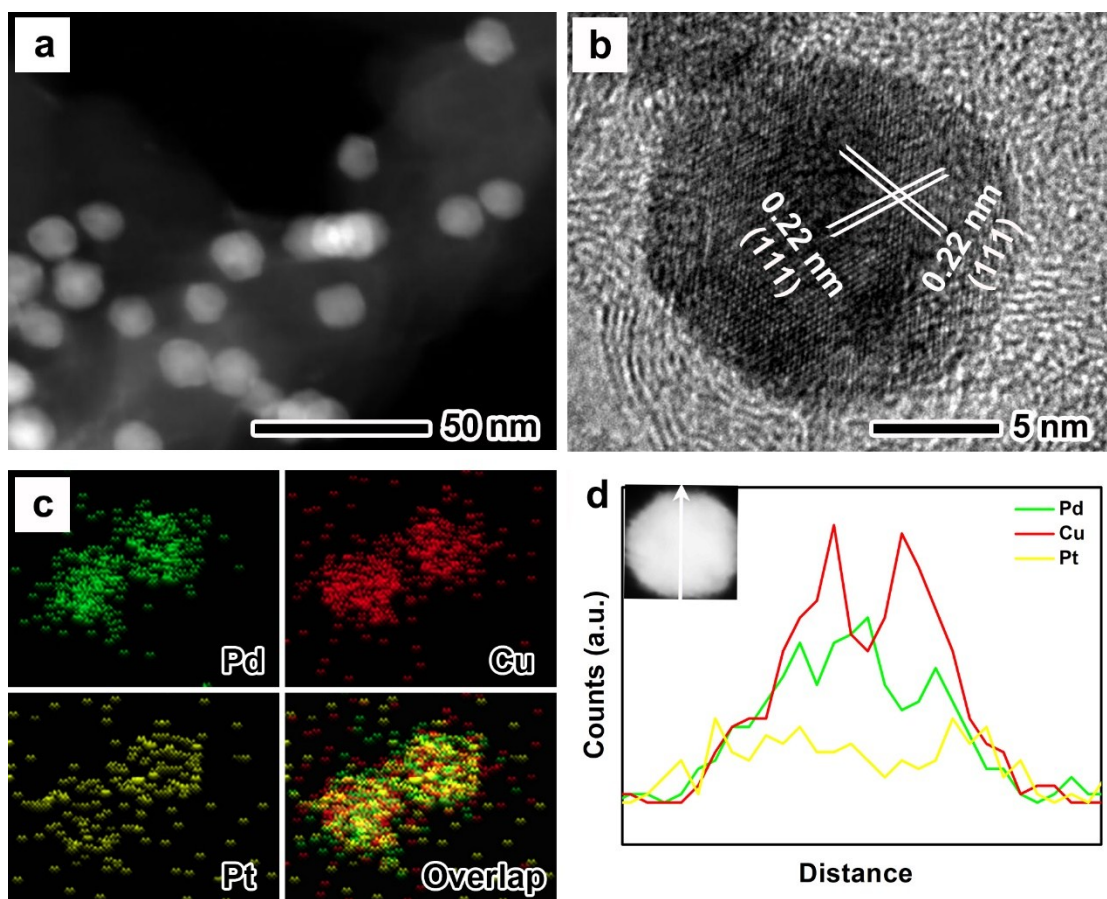

**Fig. S5** Morphological, structural, and compositional characterizations of truncated octahedral PdCu<sub>2</sub>@Pt nanocrystals (a) HAADF-STEM image, (b) HRTEM image, (c) EDX mapping image, and (d) line-scanning profiles.

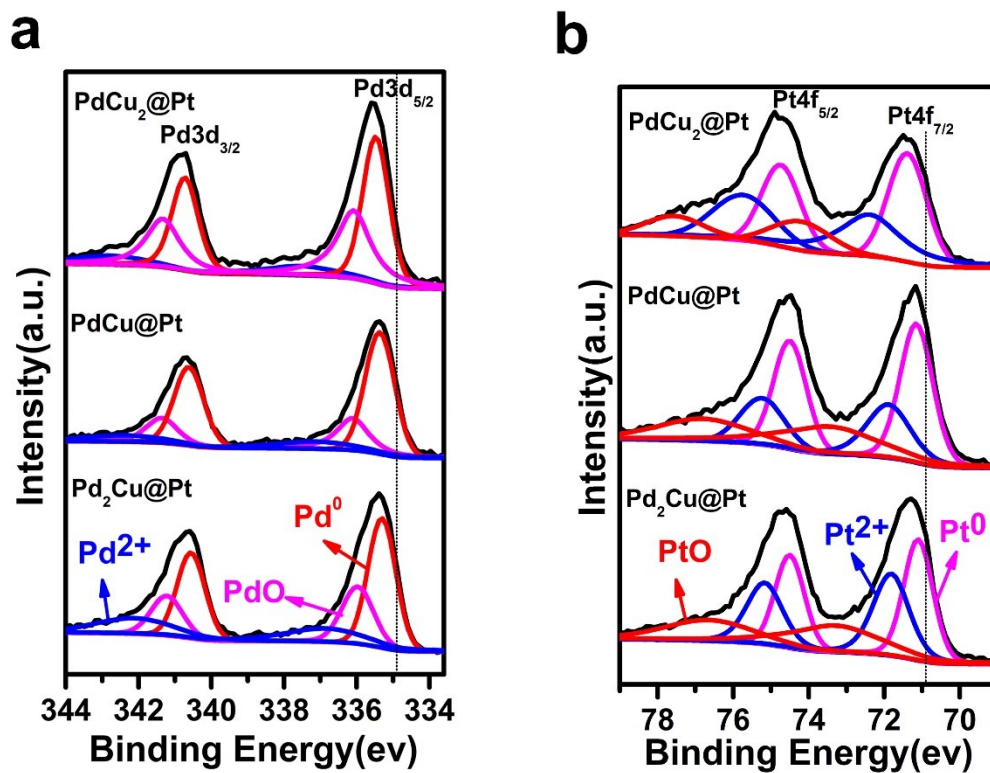

**Fig. S6** (a) Pd 3d and (b) Pt 4f XPS spectra of Pd<sub>2</sub>Cu@Pt, PdCu@Pt and PdCu<sub>2</sub>@Pt truncated octahedra.



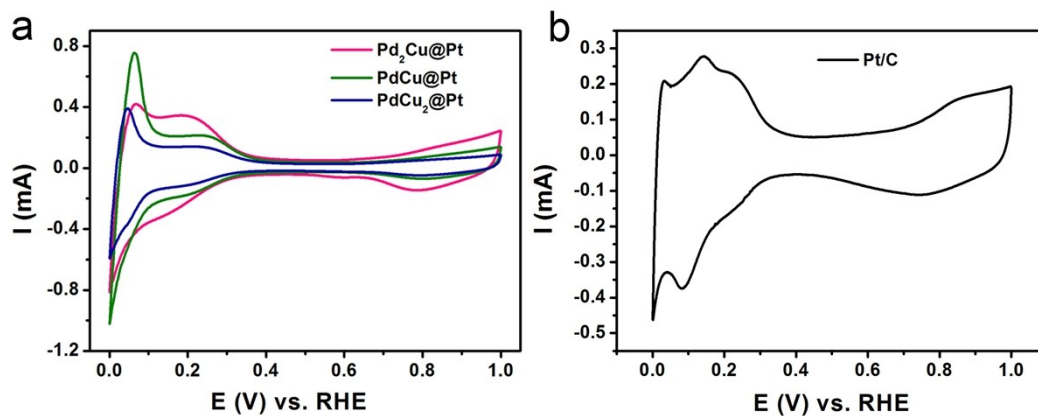

**Fig. S7** Cyclic voltammetry (CV) curves of (a) Pd<sub>2</sub>Cu@Pt, PdCu@Pt and PdCu<sub>2</sub>@Pt catalysts, and (b) Pt/C catalysts in Ar-saturated 0.1 M HClO<sub>4</sub> solution with a scan rate of 50 mV/s.

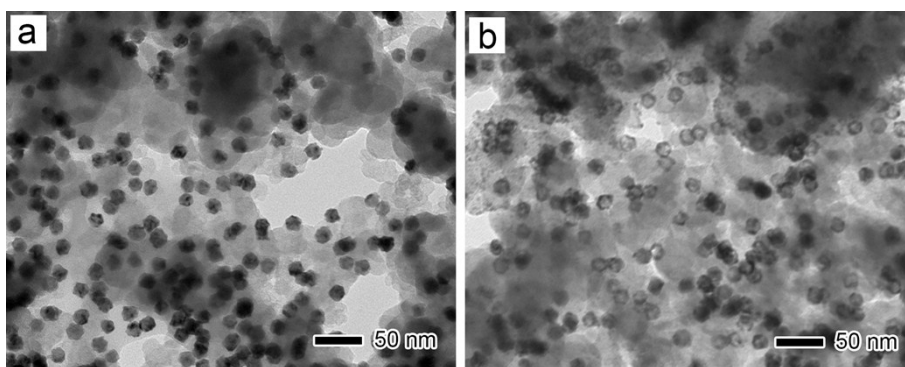

**Fig. S8** TEM images of Pd<sub>2</sub>Cu@Pt catalysts (a) before and (b) after ADTs for 10000 cycles in O<sub>2</sub> saturated 0.1 M HClO<sub>4</sub> solution.
